# Supplementary material
Source: PubMed Central journal article supplement (PMC4001548)
Supplement: JCI72619sd.pdf [file JCI72619sd.pdf]

## **SUPPLEMENTARY METHODS**

### **Acinar Cell Isolation and Culture**

Pancreata were harvested from 5 week old mice and digested with 2.5 mg/ml Collagenase D (Roche) at 37°C for 15 minutes. After multiple washes with Phosphate Buffered Saline (PBS) supplemented with 5% Fetal Bovine Serum (FBS), the collagenase digested tissue was filtered through a 100 µm Nylon mesh (BD Biosciences). The filtrate was centrifuged through 20 ml PBS supplemented with 30% FBS. The pellet was resuspended in RPMI1640 Medium (Gibco) supplemented with 10% FBS, penicillin G, streptomycin, 0.1 mg/ml Soybean Trypsin Inhibitor (Sigma-Aldrich), 1 µg/ml dexamethasone (Sigma-Aldrich), 2% Matrigel (BD Biosciences) and 1% glucose. Cells were plated in 24 well plates (4 x 10<sup>4</sup> cells/well) and maintained with Matrigel at 37°C and 5% CO<sub>2</sub>. Medium was changed on day 1 and day 3. At given time points, cells were recovered with Cell Recovery Solution (BD Biosciences).

### **Primer sequences**

The primers used for both quantitative and non quantitative PCR are: human Sin3B forward (5'-AAG CCG GGA AAT TGA TTA TG-3') and reverse (5' - CTC CAA TGG TCA AGC TCC TT -3'), mouse Sin3B forward (5'-AGA GCA TCG ACA CTC CTG GT-3') and reverse (5'-TTG AAG TCC TCC CCA CAG TC-3'), mouse α-Amylase forward (5'- TTC TGC TGC TTT CCC TCA TT-3') and reverse (5'-CAT TGT TGC ACC TTG TCA CC-3'), mouse insulin forward (5'-AAC CAC AAA GGT GCT GCT TGA C-3') and reverse (5'-CCT AAG TGA TCC GCT ACA AT -3'), mouse GAPDH forward (5'-TGC ACC ACC

AAC TGC TTA G-3') and reverse (5'-GGA TGC AGG GAT GAT GTT C-3'), mouse Il-1a forward (5'-TGAG TCG GCA AAG AAA TCA A-3') and reverse (5'-GAG AGA TGG TCA ATG GCA GA -3'), human Il-1a forward (5'-CAG TGC TGC TGA AGG AGA TG-3') and reverse (5'-AGT TTG GAT GGG CAA CTG AT -3'), mouse Il-6 forward (5'-AGA CAA AGC CAG AGT CCT TCA G-3') and reverse (5'-AGC CAC TCC TTC TGT GAC TCC-3'), mouse p15<sup>INK4B</sup> forward (5'-CGG CGA GGA CCA TTT CTG-3') and reverse (5'-GTT CAG GGC GTT GGG ATC-3'), mouse Dec1 forward (5'-AGC GAA GAC AGC AAG GAA AC-3') and reverse (5'-TCG GGT AGG AGA TCC TTC AG-3'), mouse p53 forward (5'-TGA ACCG CCG ACC TAT CCT TAC C-3') and reverse (5'-CCC AGG GCA GGC ACA AAC AC-3') and mouse p21 forward (5'-CAG ACA TTC AGA GCC ACA GG-3') and reverse (5'-AGA GAC AAC GGC ACA CTT TG-3').

## SUPPLEMENTAL FIGURE LEGENDS

**Supplementary Figure 1: Related to Figure 1. Genetic inactivation of *Sin3B* delays progression of KRAS<sup>G12D</sup> driven PanINs.**

**(A)** Paraffin sections of pancreas from Sin3B<sup>+/-</sup>p48-Cre (Sin3B<sup>p+/-</sup>) and Sin3B<sup>-/-</sup>p48-Cre (Sin3B<sup>p-/-</sup>) mice were stained with H&E or antibodies against SIN3B. Scale bar represent 50 µm.

**(B)** Quantitative PCR for Sin3B mRNA expression in pancreas from Sin3B<sup>p+/-</sup> (black bar, n=3) and Sin3B<sup>p-/-</sup> (gray bar, n=4) pancreas. Sin3B<sup>p-/-</sup> expression is relative to Sin3B<sup>p+/-</sup> expression (\*p<0.01).

**(C)** Immunohistochemistry for  $\alpha$ -Amylase (Amylase) using paraffin sections of pancreas from Sin3B<sup>p+/-</sup> and Sin3B<sup>p-/-</sup> mice. Scale bar represent 50  $\mu$ m.

**(D)** PCR for Sin3B, Insulin, Amylase and Gapdh in 3T3 cells (3T3), Mouse Embryonic fibroblasts (MEF), Wild type (WT) pancreas, Sin3B<sup>p+/-</sup>, and Sin3B<sup>p-/-</sup> pancreas.

**(E)** Immunohistochemistry for Sin3B using paraffin sections of pancreas obtained from 8 week old Sin3B<sup>p+/-</sup>Kras<sup>pG12D</sup> and Sin3B<sup>p-/-</sup>Kras<sup>pG12D</sup> mice. Scale bar represent 50  $\mu$ m.

**(F)** Quantitative PCR for Sin3B expression in pancreas obtained from Sin3B<sup>p+/-</sup>Kras<sup>pG12D</sup> (black bar, n=5) and Sin3B<sup>p-/-</sup>Kras<sup>pG12D</sup> (gray bar, n=4) pancreas. Sin3B<sup>p-/-</sup>Kras<sup>pG12D</sup> expression is relative to Sin3B<sup>p+/-</sup>Kras<sup>pG12D</sup> expression (\*p<0.0001).

**(G)** Immunohistochemistry for Sin3B using paraffin sections of pancreas obtained from 12 month-old sick animals Sin3B<sup>p+/-</sup>Kras<sup>pG12D</sup> and Sin3B<sup>p-/-</sup>Kras<sup>pG12D</sup> mice. Scale bar represent 50  $\mu$ m.

**Supplementary Figure 2: Related to figure 2. *Sin3B* deletion impairs the establishment but not the initiation of acinar-to-ductal metaplasia in vivo.**

(A) H&E of paraffin sections from 5 week old *Sin3B<sup>p+/-</sup>Kras<sup>pG12D</sup>* and *Sin3B<sup>p-/-</sup>Kras<sup>pG12D</sup>* mice used for acinar 3D cultures. Scale bar represent 50  $\mu$ m.

(B) Quantitative PCR for *Sin3B* mRNA expression in acinar 3D cultures obtained from *Sin3B<sup>p+/-</sup>Kras<sup>pG12D</sup>* and *Sin3B<sup>p-/-</sup>Kras<sup>pG12D</sup>* mouse pancreas one day (d1), 3 days (d3) and 5 days (d5) after plating in 3D culture. Black bars represent *Sin3B<sup>p+/-</sup>Kras<sup>pG12D</sup>* cells and gray bars represent *Sin3B<sup>p-/-</sup>Kras<sup>pG12D</sup>* cells. *Sin3B<sup>p-/-</sup>Kras<sup>pG12D</sup>* levels for *Sin3B* are relative to *Sin3B<sup>p+/-</sup>Kras<sup>pG12D</sup>* levels. \*p<0.001 for d1, \*p<0.05 for d3 and \*p<0.001 for d5.

**Supplementary Figure 3: Related to figure 3. *Sin3B* deletion impairs oncogene KRAS-induced senescence in vivo.**

(A) Immunohistochemistry for Phospho-HP1 $\gamma$  (P-HP1 $\gamma$ ) on paraffin sections of 24 week old *Sin3B<sup>p+/-</sup>Kras<sup>pG12D</sup>* and *Sin3B<sup>p-/-</sup>Kras<sup>pG12D</sup>* pancreata.. Scale bar represent 50  $\mu$ m.

(B) Immunohistochemistry for Sin3B and DEC1 on one 12 month old *Sin3B<sup>p+/-</sup>Kras<sup>pG12D</sup>* and three different 12 month-old *Sin3B<sup>p-/-</sup>Kras<sup>pG12D</sup>* pancreata. Scale bar represent 50  $\mu$ m.

**Supplementary Figure 4: Related to figure 4. Loss of SIN3B mitigates oncogenic KRAS-driven inflammatory response in vivo.**

- (A) Immunohistochemistry for phosphorylated-STAT3 (P-STAT3), phosphorylated-ERK1/2 (P-ERK1/2) and active P65 staining of 6 week old *Sin3B<sup>p+/-</sup>Kras<sup>pG12D</sup>* and *Sin3B<sup>p-/-</sup>Kras<sup>pG12D</sup>* pancreata. Scale bar represent 50  $\mu$ m.
- (B) Western Blot for phosphorylated-ERK1/2 (P-ERK1/2) and total ERK1/2 and for phosphorylated-Stat3 (P-STAT3) and total STAT3 on *Sin3B<sup>p+/-</sup>Kras<sup>pG12D</sup>* and *Sin3B<sup>p-/-</sup>Kras<sup>pG12D</sup>* 6 week and 24 week old pancreata. Lanes were run on the same gel but were noncontiguous.
- (C) Quantitative PCR for *Il-1a* and *Il-6* mRNA expression in pancreas obtained from 6 to 12 month (6-12 months) and 12 month *Sin3B<sup>p+/-</sup>Kras<sup>pG12D</sup>* and *Sin3B<sup>p-/-</sup>Kras<sup>pG12D</sup>* mice. Black bars represent *Sin3B<sup>p+/-</sup>Kras<sup>pG12D</sup>* pancreas and grey bars represent *Sin3B<sup>p-/-</sup>Kras<sup>pG12D</sup>* pancreas. *Sin3B<sup>p-/-</sup>Kras<sup>pG12D</sup>* mRNA expression are relative to the *Sin3B<sup>p+/-</sup>Kras<sup>pG12D</sup>* expression.

**Supplementary Figure 5: Related to Figure 5. SIN3B is required for cell autonomous *Il-1a* expression.**

- (A) Pie chart showing the percentage of genes related to the immune system, which are down-regulated (left) and up-regulated (right) in *Sin3B<sup>p-/-</sup>Kras<sup>pG12D</sup>* pancreas. This was made using the pie chart viewer from the Panther Classification System.
- (B) Quantitative PCR for *Il-6* mRNA expression in pancreatic duct cell (PDEC) cultures obtained from *Sin3B<sup>p+/-</sup>Kras<sup>pG12D</sup>* and *Sin3B<sup>p-/-</sup>Kras<sup>pG12D</sup>* pancreas. Black

bars represent *Sin3B*<sup>p+/-</sup> *Kras*<sup>pG12D</sup> PDEC lines and gray bars represent *Sin3B*<sup>p-/-</sup> *Kras*<sup>pG12D</sup> PDEC lines. *Sin3B*<sup>p-/-</sup> *Kras*<sup>pG12D</sup> mRNA levels are relative to *Sin3B*<sup>p+/-</sup> *Kras*<sup>pG12D</sup> levels.

**(C)** Quantitative PCR for *Il-6* mRNA expression in acinar 3D cultures obtained from *Sin3B*<sup>p+/-</sup> *Kras*<sup>pG12D</sup> and *Sin3B*<sup>p-/-</sup> *Kras*<sup>pG12D</sup> mice one day (d1), 3 days (d3) and 5 days (d5) after plating in 3D culture. Black bars represent *Sin3B*<sup>p+/-</sup> *Kras*<sup>pG12D</sup> cells and gray bars represent *Sin3B*<sup>p-/-</sup> *Kras*<sup>pG12D</sup> cells. *Sin3B*<sup>p-/-</sup> *Kras*<sup>pG12D</sup> mRNA levels are relative to *Sin3B*<sup>p+/-</sup> *Kras*<sup>pG12D</sup> levels.

**Supplementary Figure 6: IL-1 $\alpha$  expression correlates with senescence in the pancreas.**

**(A)** Kaplan Meier Survival curve of *Sin3B*<sup>p+/-</sup> *Kras*<sup>pG12D</sup> *Ink4a*<sup>p-/-</sup> mice (black, n=23) and *Sin3B*<sup>p-/-</sup> *Kras*<sup>pG12D</sup> *Ink4a*<sup>p-/-</sup> mice (red, n=14).

**(B)** H&E staining on *Sin3B*<sup>p+/-</sup> *Kras*<sup>pG12D</sup> *Ink4a*<sup>p-/-</sup> and *Sin3B*<sup>p-/-</sup> *Kras*<sup>pG12D</sup> *Ink4a*<sup>p-/-</sup> pancreata. Scale bar represent 50  $\mu$ m.

**(C)** Immunohistochemistry for CK19 on *Sin3B*<sup>p+/-</sup> *Kras*<sup>pG12D</sup> *Ink4a*<sup>p-/-</sup> and *Sin3B*<sup>p-/-</sup> *Kras*<sup>pG12D</sup> *Ink4a*<sup>p-/-</sup> pancreata. Scale bar represent 50  $\mu$ m.

**(D)** Cryogenic sections stained for Senescence-associated  $\beta$ -galactosidase (SA- $\beta$ -GAL) on *Sin3B*<sup>p+/-</sup> *Kras*<sup>pG12D</sup> *Ink4a*<sup>p-/-</sup> and *Sin3B*<sup>p-/-</sup> *Kras*<sup>pG12D</sup> *Ink4a*<sup>p-/-</sup> pancreata. Scale bar represent 50  $\mu$ m.

(E) Quantitative PCR for  $p15^{INK4B}$  and *Dec1* mRNA expression in pancreas obtained from  $Sin3B^{p+/-}Kras^{pG12D}$  (black bars, n=3),  $Sin3B^{p+/-}Kras^{pG12D}Ink4a^{p-/-}$  (gray bars, n=3) and  $Sin3B^{p-/-}Kras^{pG12D}Ink4a^{p-/-}$  (dark gray bars, n=2) mice.  $Sin3B^{p+/-}Kras^{pG12D}Ink4a^{p-/-}$  and  $Sin3B^{p-/-}Kras^{pG12D}Ink4a^{p-/-}$  values are relative to  $Sin3B^{p+/-}Kras^{pG12D}$  value. *Dec1* (ND: not detected).  $p15^{INK4B}$  (\*p<0.05).

(F) Immunohistochemistry for CD45 and F4/80 on  $Sin3B^{p+/-}Kras^{pG12D}Ink4a^{p-/-}$  and  $Sin3B^{p-/-}Kras^{pG12D}Ink4a^{p-/-}$  pancreata. Scale bar represent 50  $\mu$ m.

(G) Quantitative PCR for *Il-6* and *Il-1a* mRNA expression in pancreas obtained from  $Sin3B^{p+/-}Kras^{pG12D}$  (black bars, n=3),  $Sin3B^{p+/-}Kras^{pG12D}Ink4a^{p-/-}$  (grey bars, n=3) and  $Sin3B^{p-/-}Kras^{pG12D}Ink4a^{p-/-}$  (dark gray bars, n=2) mice.  $Sin3B^{p+/-}Kras^{pG12D}Ink4a^{p-/-}$  and  $Sin3B^{p-/-}Kras^{pG12D}Ink4a^{p-/-}$  values are relative to  $Sin3B^{p+/-}Kras^{pG12D}$  values. ND: not detected.

**Supplementary Figure 7: Related to Figure 6. SIN3B levels correlate with an inflammatory response in both human pancreatic tissue and cancer cells.**

Quantitative PCR for *SIN3B* (\*p<0.005) and *IL-1 $\alpha$*  (\*p<0.05) mRNA expression in BxPc3 cells infected with empty vector (black bars) or a shRNA against *SIN3B* (shSIN3B, gray bars). shSIN3B mRNA levels are relative to empty vector levels.

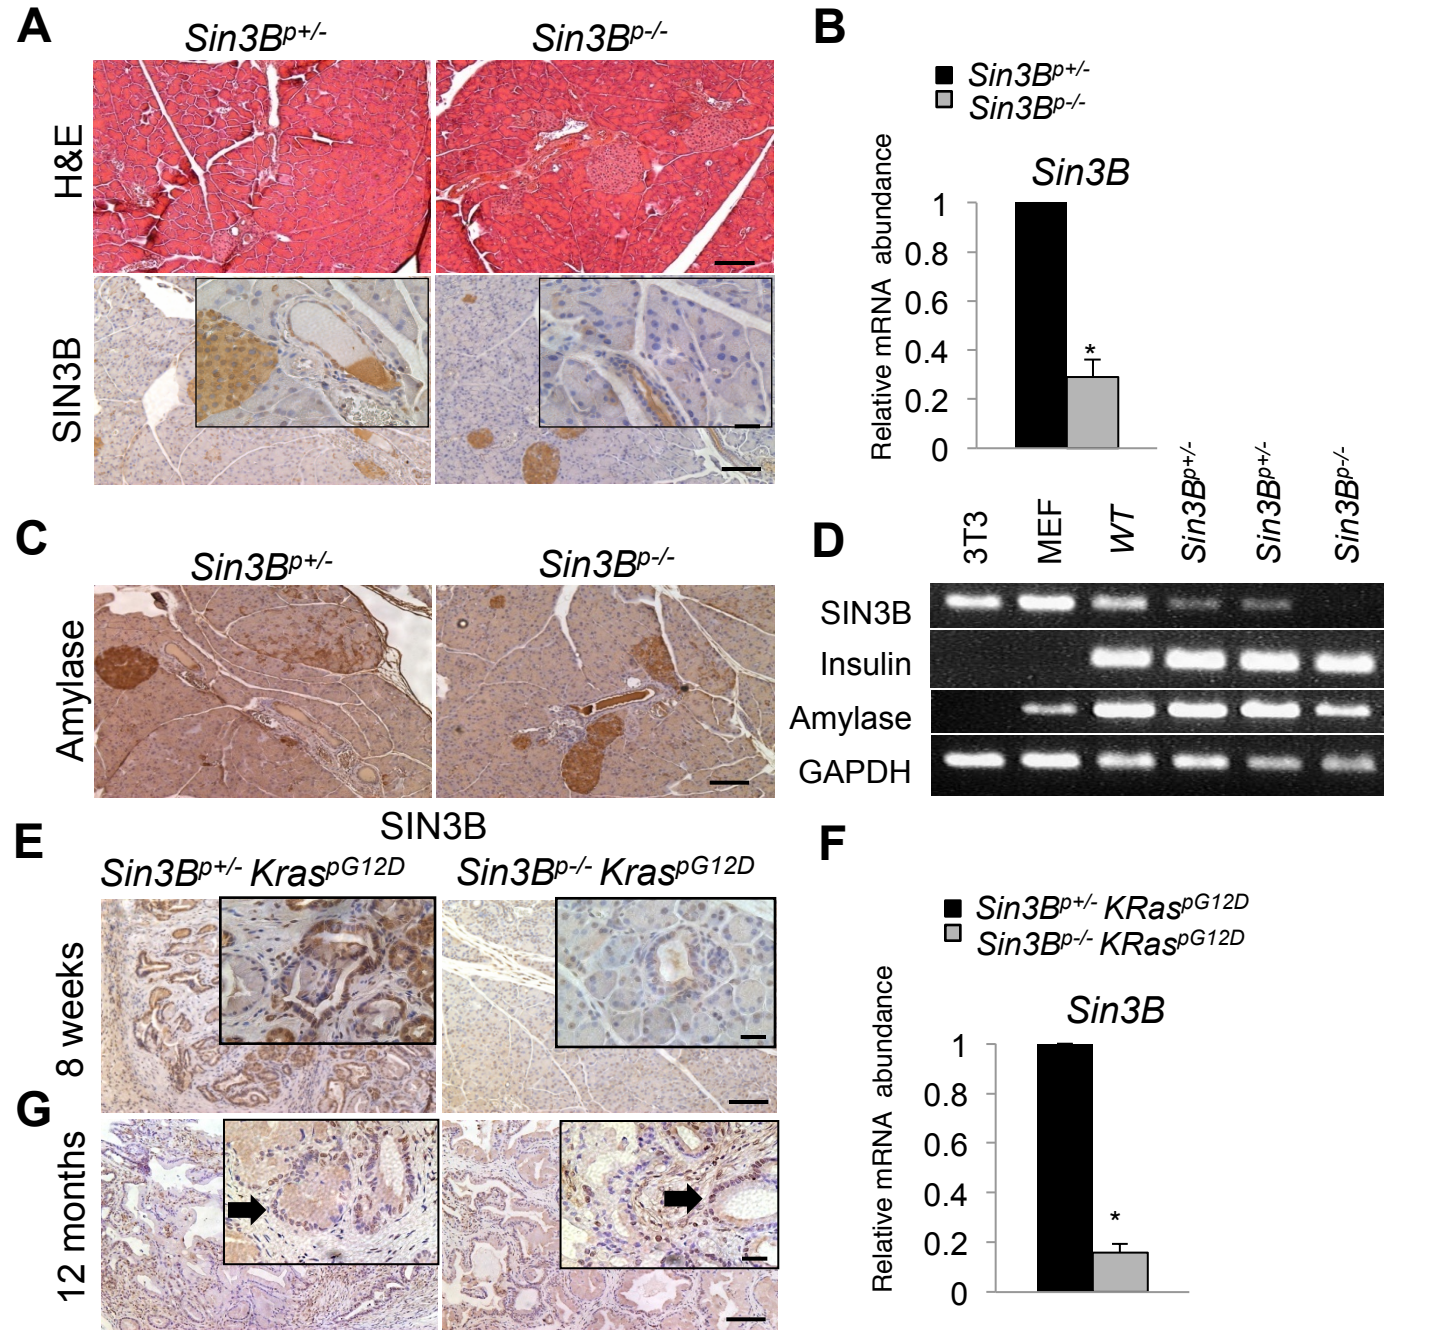

**Supplementary Figure 1: Related to Figure 1. Genetic inactivation of *Sin3B* delays progression of *KRAS*<sup>G12D</sup> driven PanINs.**

(A) Paraffin sections of pancreas from *Sin3B*<sup>p+/+</sup>p48-Cre (*Sin3B*<sup>p+/+</sup>) and *Sin3B*<sup>p-/-</sup>p48-Cre (*Sin3B*<sup>p-/-</sup>) mice were stained with H&E or antibodies against SIN3B. Scale bar represent 50  $\mu$ m. (B) Quantitative PCR for *Sin3B* mRNA expression in pancreas from *Sin3B*<sup>p+/+</sup> (black bar, n=3) and *Sin3B*<sup>p-/-</sup> (gray bar, n=4) pancreas. *Sin3B*<sup>p-/-</sup> expression is relative to *Sin3B*<sup>p+/+</sup> expression (\*p<0.01). (C) Immunohistochemistry for  $\alpha$ -Amylase (Amylase) using paraffin sections of pancreas from *Sin3B*<sup>p+/+</sup> and *Sin3B*<sup>p-/-</sup> mice. Scale bar represent 50  $\mu$ m. (D) PCR for *Sin3B*, *Insulin*, *Amylase* and *Gapdh* in 3T3 cells (3T3), Mouse Embryonic fibroblasts (MEF), Wild type (WT) pancreas, *Sin3B*<sup>p+/+</sup>, and *Sin3B*<sup>p-/-</sup> pancreas. (E) Immunohistochemistry for *Sin3B* using paraffin sections of pancreas obtained from 8 week old *Sin3B*<sup>p+/+</sup>-*Kras*<sup>pG12D</sup> and *Sin3B*<sup>p-/-</sup>-*Kras*<sup>pG12D</sup> mice. Scale bar represent 50  $\mu$ m. (F) Quantitative PCR for *Sin3B* expression in pancreas obtained from *Sin3B*<sup>p+/+</sup>-*Kras*<sup>pG12D</sup> (black bar, n=5) and *Sin3B*<sup>p-/-</sup>-*Kras*<sup>pG12D</sup> (gray bar, n=4) pancreas. *Sin3B*<sup>p-/-</sup>-*Kras*<sup>pG12D</sup> expression is relative to *Sin3B*<sup>p+/+</sup>-*Kras*<sup>pG12D</sup> expression (\*p<0.0001). (G) Immunohistochemistry for *Sin3B* using paraffin sections of pancreas obtained from 12 month-old sick animals *Sin3B*<sup>p+/+</sup>-*Kras*<sup>pG12D</sup> and *Sin3B*<sup>p-/-</sup>-*Kras*<sup>pG12D</sup> mice. Scale bar represent 50  $\mu$ m.

**A**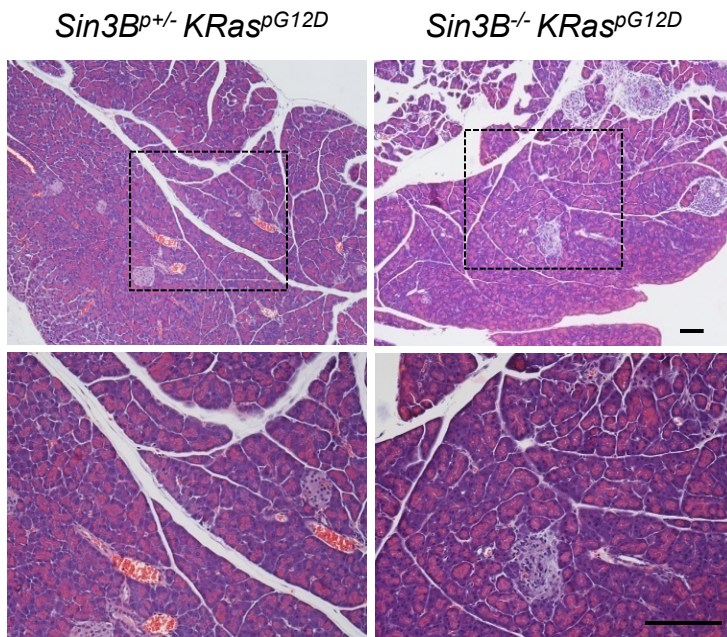**B**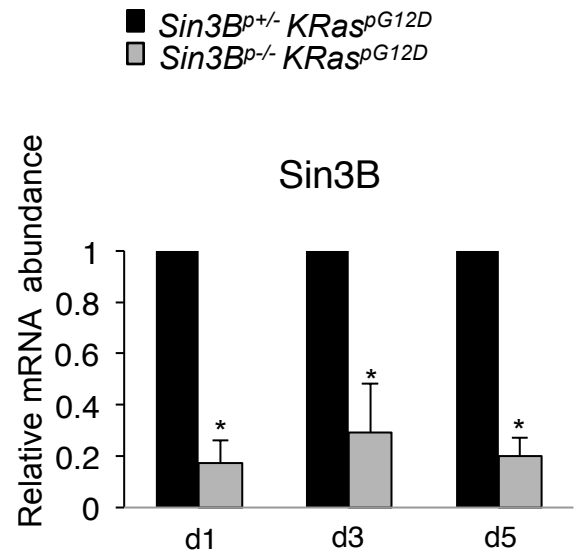

**Supplementary Figure 2: Related to figure 2. *Sin3B* deletion impairs the establishment but not the initiation of acinar-to-ductal metaplasia in vivo**

(A) &E of paraffin sections from 5 week old *Sin3B*<sup>+/+</sup> *Kras*<sup>pG12D</sup> and *Sin3B*<sup>-/-</sup> *Kras*<sup>pG12D</sup> mice used for acinar 3D cultures. Scale bar represent 50 μm. (B) Quantitative PCR for *Sin3B* mRNA expression in acinar 3D cultures obtained from *Sin3B*<sup>+/+</sup> *Kras*<sup>pG12D</sup> and *Sin3B*<sup>-/-</sup> *Kras*<sup>pG12D</sup> mouse pancreas one day (d1), 3 days (d3) and 5 days (d5) after plating in 3D culture. Black bars represent *Sin3B*<sup>+/+</sup> *Kras*<sup>pG12D</sup> cells and gray bars represent *Sin3B*<sup>-/-</sup> *Kras*<sup>pG12D</sup> cells. *Sin3B*<sup>-/-</sup> *Kras*<sup>pG12D</sup> levels for *Sin3B* are relative to *Sin3B*<sup>+/+</sup> *Kras*<sup>pG12D</sup> levels. \*p<0.001 for d1, \*p<0.05 for d3 and \*p<0.001 for d5.

**A***Sin3B*<sup>p+/-</sup> *KRas*<sup>pG12D</sup>*Sin3B*<sup>p-/-</sup> *KRas*<sup>pG12D</sup>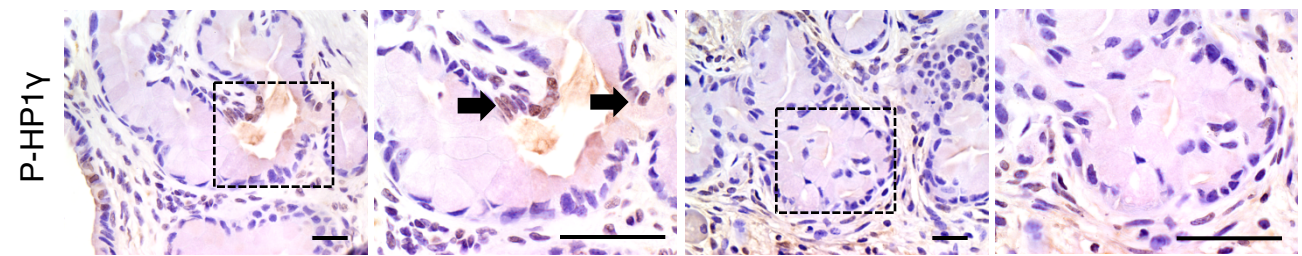**B**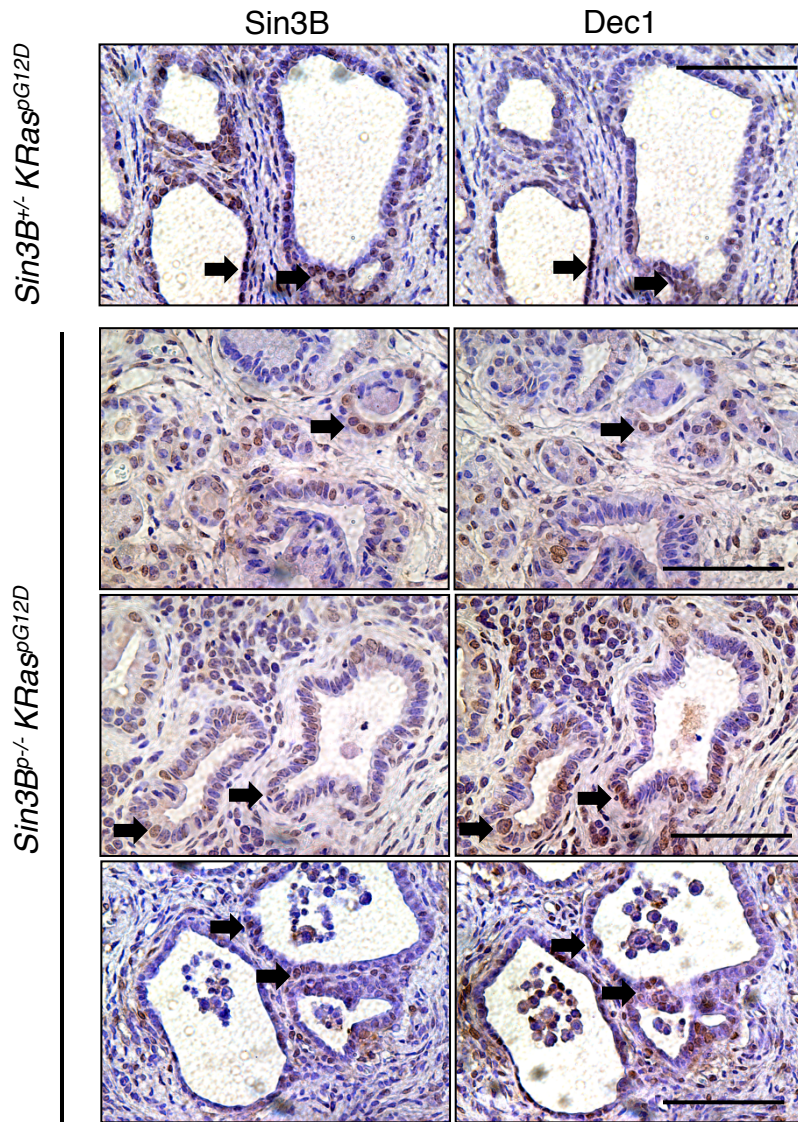

**Supplementary Figure 3: Related to figure 3. *Sin3B* deletion impairs oncogene KRAS-induced senescence in vivo**

(A) Immunohistochemistry for Phospho-HP1 $\gamma$  (P-HP1 $\gamma$ ) on paraffin sections of 24 week old *Sin3B*<sup>p+/-</sup> *KRas*<sup>pG12D</sup> and *Sin3B*<sup>p-/-</sup> *KRas*<sup>pG12D</sup> pancreata.. Scale bar represent 50  $\mu$ m. (B) Immunohistochemistry for Sin3B and DEC1 on one 12 month old *Sin3B*<sup>p+/-</sup> *KRas*<sup>pG12D</sup> and three different 12 month-old *Sin3B*<sup>p-/-</sup> *KRas*<sup>pG12D</sup> pancreata. Scale bar represent 50  $\mu$ m.

**A**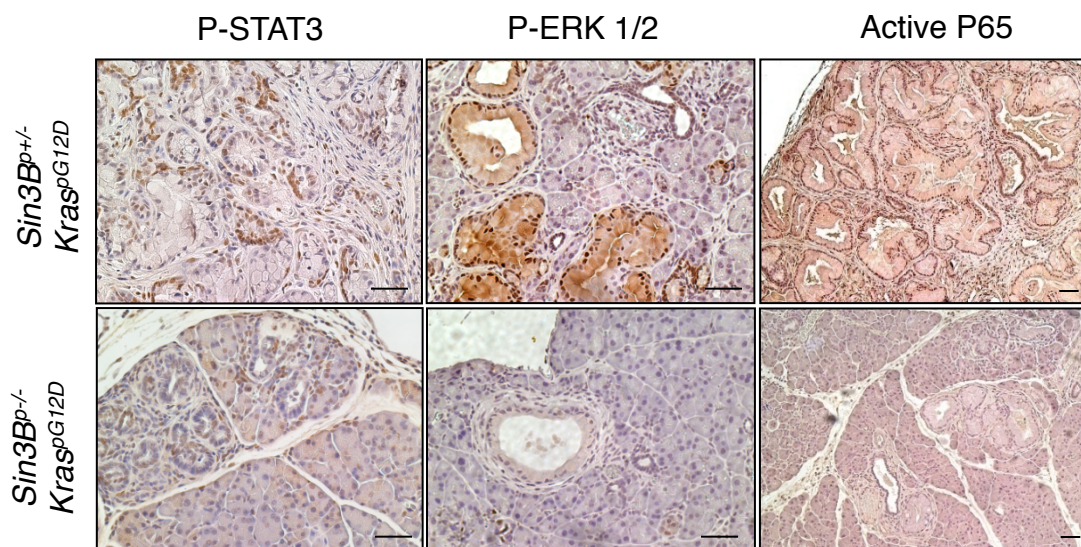**B**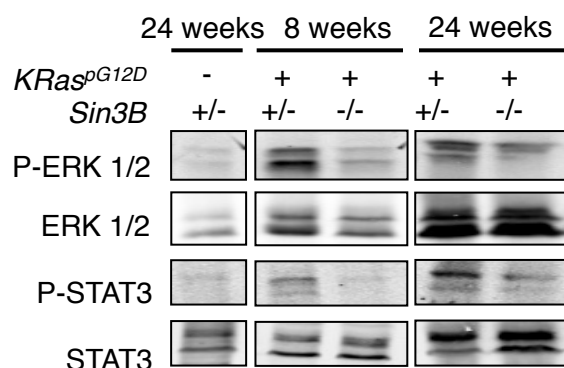**C**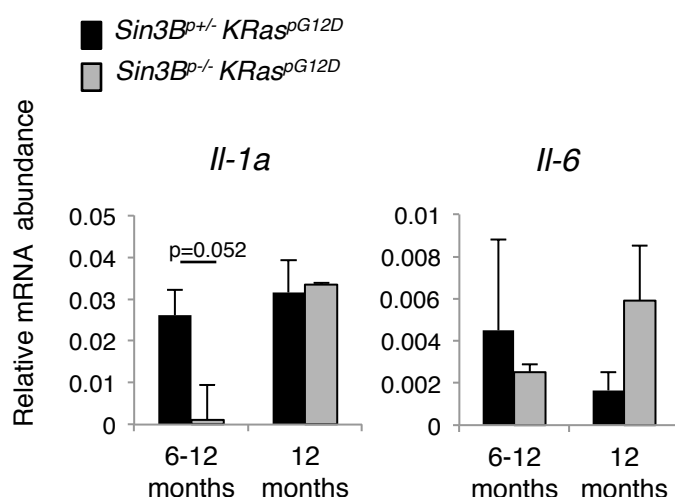

#### Supplementary Figure 4: Related to figure 4. Loss of SIN3B mitigates oncogenic KRAS-driven inflammatory response in vivo

(A) Immunohistochemistry for phosphorylated-STAT3 (P-STAT3), phosphorylated-ERK1/2 (P-ERK1/2) and active P65 staining of 6 week old Sin3B<sup>p+/+</sup>Kras<sup>pG12D</sup> and Sin3B<sup>p-/-</sup>Kras<sup>pG12D</sup> pancreata. Scale bar represent 50 μm. (B) Western Blot for phosphorylated-ERK1/2 (P-ERK1/2) and total ERK1/2 and for phosphorylated-Stat3 (P-STAT3) and total STAT3 on Sin3B<sup>p+/+</sup>Kras<sup>pG12D</sup> and Sin3B<sup>p-/-</sup>Kras<sup>pG12D</sup> 6 week and 24 week old pancreata. Lanes were run on the same gel but were noncontiguous. (C) Quantitative PCR for Il-1a and Il-6 mRNA expression in pancreas obtained from 6 to 12 month (6-12 months) and 12 month Sin3B<sup>p+/+</sup>Kras<sup>pG12D</sup> and Sin3B<sup>p-/-</sup>Kras<sup>pG12D</sup> mice. Black bars represent Sin3B<sup>p+/+</sup>Kras<sup>pG12D</sup> pancreas and grey bars represent Sin3B<sup>p-/-</sup>Kras<sup>pG12D</sup> pancreas. Sin3B<sup>p-/-</sup>Kras<sup>pG12D</sup> mRNA expression are relative to the Sin3B<sup>p+/+</sup>Kras<sup>pG12D</sup> expression.

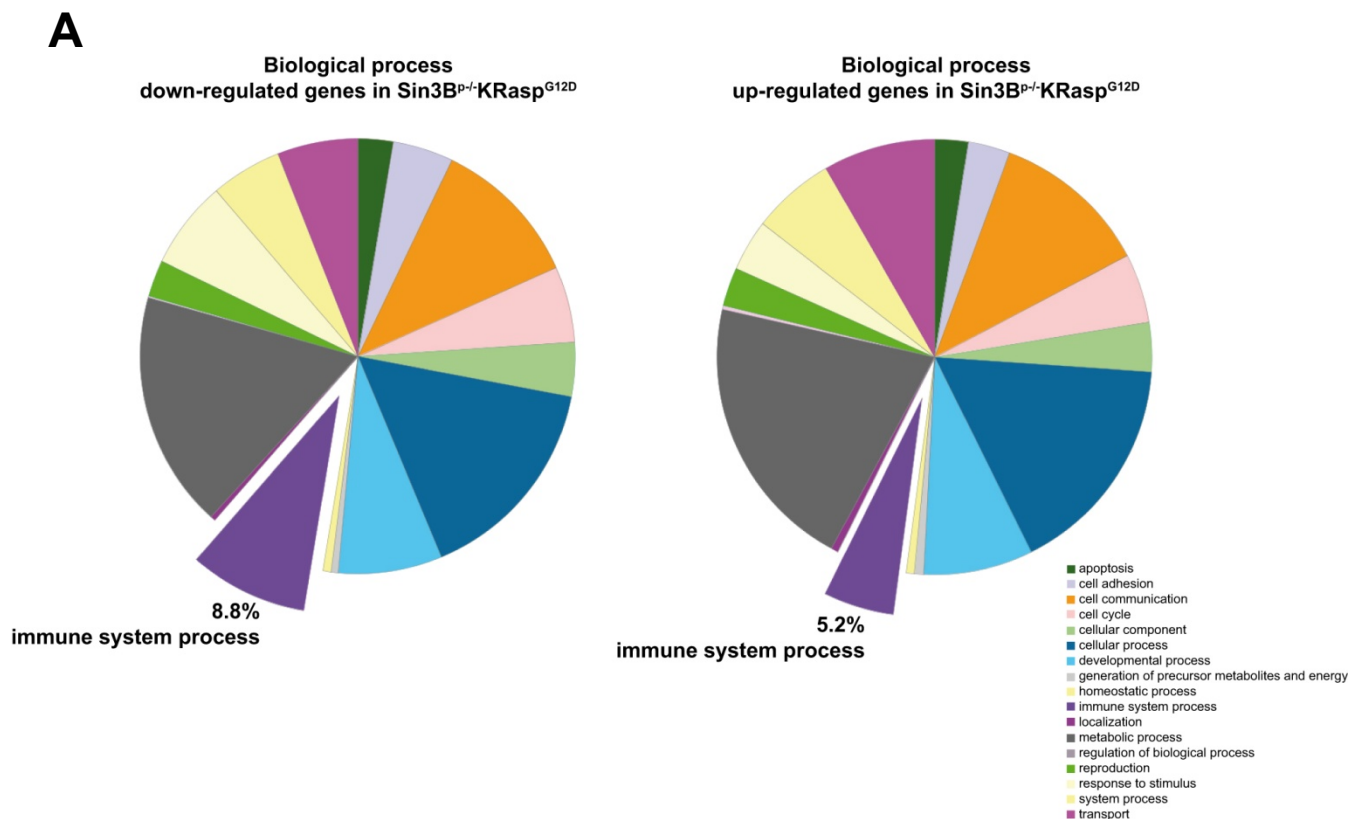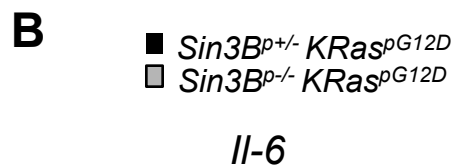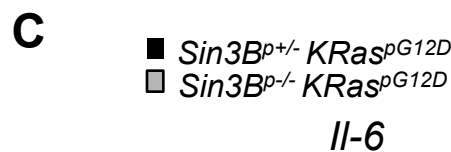

**Supplementary Figure 5: Related to Figure 5. SIN3B is required for cell autonomous *Il-1a* expression**

(A) Pie chart showing the percentage of genes related to the immune system, which are down-regulated (left) and up-regulated (right) in  $Sin3B^{p+/-}Kras^{pG12D}$  pancreas. This was made using the pie chart viewer from the Panther Classification System. (B) Quantitative PCR for *Il-6* mRNA expression in pancreatic duct cell (PDEC) cultures obtained from  $Sin3B^{p+/-}Kras^{pG12D}$  and  $Sin3B^{p-/-}Kras^{pG12D}$  pancreas. Black bars represent  $Sin3B^{p+/-}Kras^{pG12D}$  PDEC lines and gray bars represent  $Sin3B^{p-/-}Kras^{pG12D}$  PDEC lines.  $Sin3B^{p-/-}Kras^{pG12D}$  mRNA levels are relative to  $Sin3B^{p+/-}Kras^{pG12D}$  levels. (C) Quantitative PCR for *Il-6* mRNA expression in acinar 3D cultures obtained from  $Sin3B^{p+/-}Kras^{pG12D}$  and  $Sin3B^{p-/-}Kras^{pG12D}$  mice one day (d1), 3 days (d3) and 5 days (d5) after plating in 3D culture. Black bars represent  $Sin3B^{p+/-}Kras^{pG12D}$  cells and gray bars represent  $Sin3B^{p-/-}Kras^{pG12D}$  cells.  $Sin3B^{p-/-}Kras^{pG12D}$  mRNA levels are relative to  $Sin3B^{p+/-}Kras^{pG12D}$  levels.

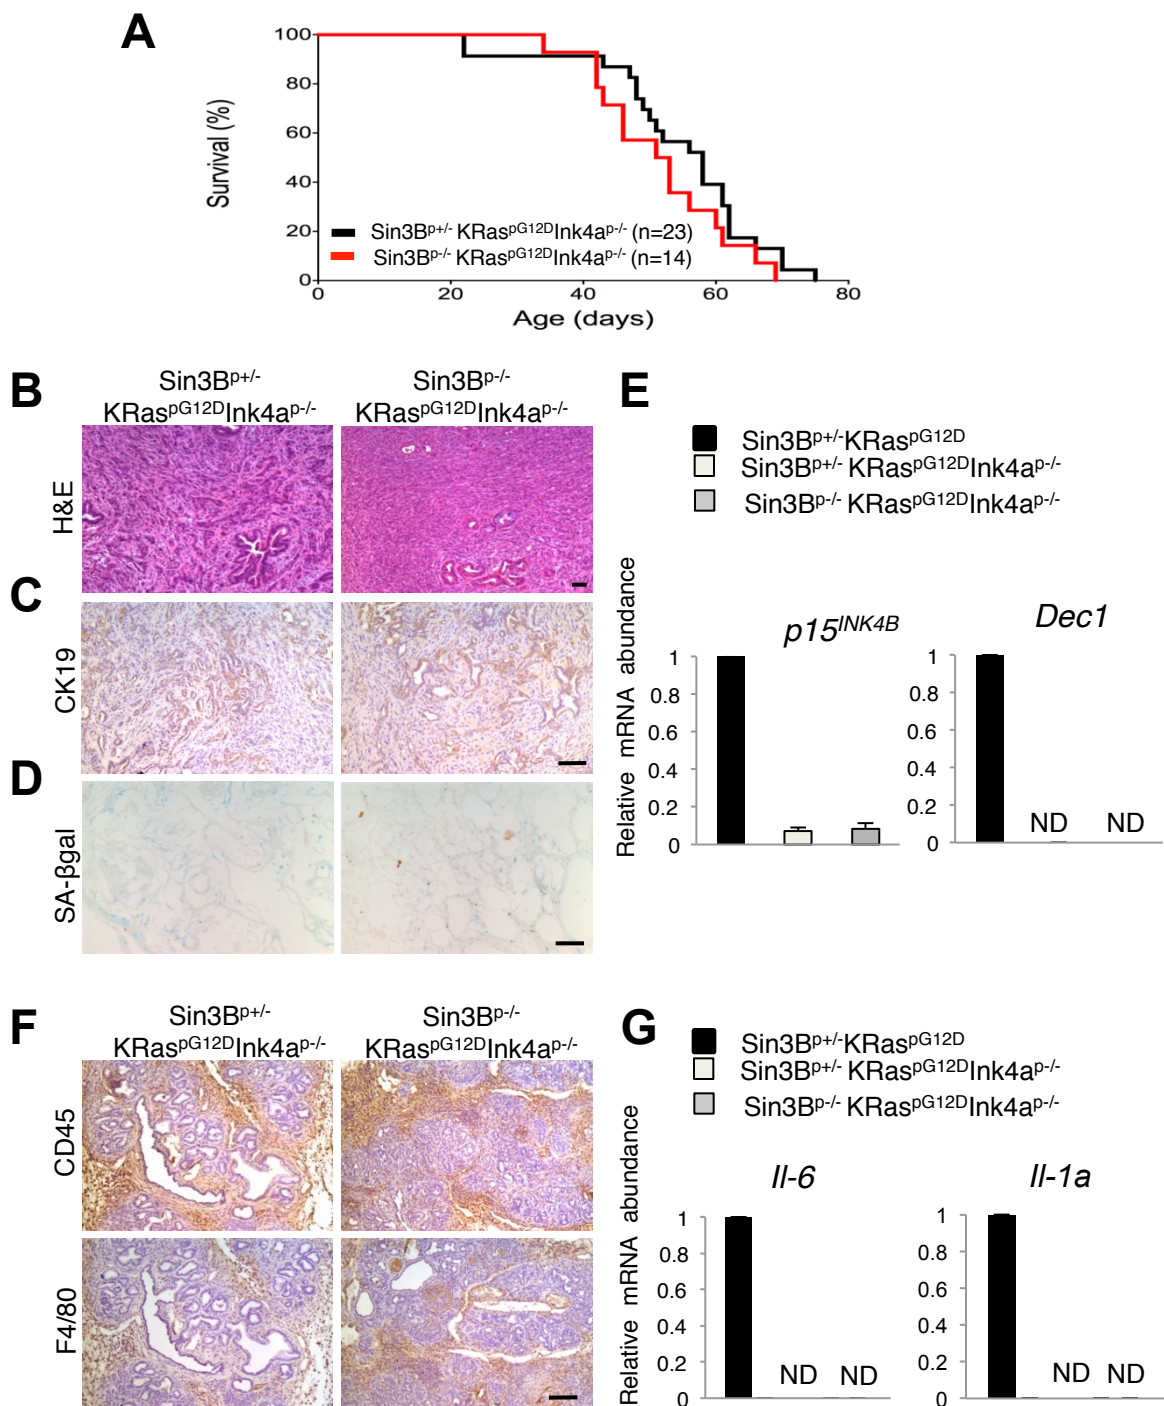

**Supplementary Figure 6: IL-1α expression correlates with senescence in the pancreas**

(A) Kaplan Meier Survival curve of Sin3B<sup>+/+</sup> Kras<sup>pG12D</sup> Ink4a<sup>-/-</sup> mice (black, n=23) and Sin3B<sup>-/-</sup> Kras<sup>pG12D</sup> Ink4a<sup>-/-</sup> mice (red, n=14). (B) H&E staining on Sin3B<sup>+/+</sup> Kras<sup>pG12D</sup> Ink4a<sup>-/-</sup> and Sin3B<sup>-/-</sup> Kras<sup>pG12D</sup> Ink4a<sup>-/-</sup> pancreata. Scale bar represent 50 μm. (C) Immunohistochemistry for CK19 on Sin3B<sup>+/+</sup> Kras<sup>pG12D</sup> Ink4a<sup>-/-</sup> and Sin3B<sup>-/-</sup> Kras<sup>pG12D</sup> Ink4a<sup>-/-</sup> pancreata. Scale bar represent 50 μm. (D) Cryogenic sections stained for Senescence-associated β-galactosidase (SA-β-GAL) on Sin3B<sup>+/+</sup> Kras<sup>pG12D</sup> Ink4a<sup>-/-</sup> and Sin3B<sup>-/-</sup> Kras<sup>pG12D</sup> Ink4a<sup>-/-</sup> pancreata. Scale bar represent 50 μm. (E) Quantitative PCR for *p15<sup>INK4B</sup>* and *Dec1* mRNA expression in pancreas obtained from Sin3B<sup>+/+</sup> Kras<sup>pG12D</sup> (black bars, n=3), Sin3B<sup>+/+</sup> Kras<sup>pG12D</sup> Ink4a<sup>-/-</sup> (gray bars, n=3) and Sin3B<sup>-/-</sup> Kras<sup>pG12D</sup> Ink4a<sup>-/-</sup> (dark gray bars, n=2) mice. Sin3B<sup>+/+</sup> Kras<sup>pG12D</sup> Ink4a<sup>-/-</sup> and Sin3B<sup>-/-</sup> Kras<sup>pG12D</sup> Ink4a<sup>-/-</sup> values are relative to Sin3B<sup>+/+</sup> Kras<sup>pG12D</sup> value. *Dec1* (ND: not detected). *p15<sup>INK4B</sup>* (\*p<0.05). (F) Immunohistochemistry for CD45 and F4/80 on Sin3B<sup>+/+</sup> Kras<sup>pG12D</sup> Ink4a<sup>-/-</sup> and Sin3B<sup>-/-</sup> Kras<sup>pG12D</sup> Ink4a<sup>-/-</sup> pancreata. Scale bar represent 50 μm. (G) Quantitative PCR for *Il-6* and *Il-1α* mRNA expression in pancreas obtained from Sin3B<sup>+/+</sup> Kras<sup>pG12D</sup> (black bars, n=3), Sin3B<sup>+/+</sup> Kras<sup>pG12D</sup> Ink4a<sup>-/-</sup> (grey bars, n=3) and Sin3B<sup>-/-</sup> Kras<sup>pG12D</sup> Ink4a<sup>-/-</sup> (dark gray bars, n=2) mice. Sin3B<sup>+/+</sup> Kras<sup>pG12D</sup> Ink4a<sup>-/-</sup> and Sin3B<sup>-/-</sup> Kras<sup>pG12D</sup> Ink4a<sup>-/-</sup> values are relative to Sin3B<sup>+/+</sup> Kras<sup>pG12D</sup> values. ND: not detected.

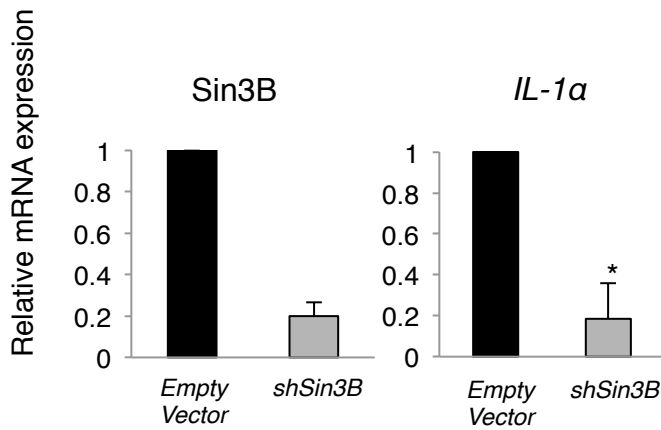

**Supplementary Figure 7: Related to Figure 6. SIN3B levels correlates with an inflammatory response in both human pancreatic tissue and cancer cells**

Quantitative PCR for *SIN3B* (\*p<0.005) and *IL-1 $\alpha$*  (\*p<0.05) mRNA expression in BxPc3 cells infected with empty vector (black bars) or a shRNA against *SIN3B* (shSIN3B, gray bars). shSIN3B mRNA levels are relative to empty vector levels.

Supplementary Table 1: Information of animals used for survival curve

| mouse number | genotype                                        | date of birth | date of death | number of days of survival | status <sup>A</sup> |
|--------------|-------------------------------------------------|---------------|---------------|----------------------------|---------------------|
| 937          | <i>Sin3B<sup>p/-</sup>KRas<sup>pG12D</sup></i>  | 9/26/2012     | 5/29/2013     | 245                        | S                   |
| 895          | <i>Sin3B<sup>p/-</sup>KRas<sup>pG12D</sup></i>  | 9/5/2012      | 5/29/2013     | 266                        | S                   |
| 805          | <i>Sin3B<sup>p/-</sup>KRas<sup>pG12D</sup></i>  | 8/8/2012      | 5/29/2013     | 294                        | A                   |
| 799          | <i>Sin3B<sup>p/-</sup>KRas<sup>pG12D</sup></i>  | 8/5/2012      | 5/15/2013     | 283                        | D                   |
| 796          | <i>Sin3B<sup>p/-</sup>KRas<sup>pG12D</sup></i>  | 7/31/2012     | 5/29/2013     | 302                        | A                   |
| 741          | <i>Sin3B<sup>p/-</sup>KRas<sup>pG12D</sup></i>  | 7/15/2012     | 5/29/2013     | 318                        | A                   |
| 687          | <i>Sin3B<sup>p/-</sup>KRas<sup>pG12D</sup></i>  | 6/19/2012     | 5/29/2013     | 344                        | S                   |
| 550          | <i>Sin3B<sup>p/-</sup>KRas<sup>pG12D</sup></i>  | 4/29/2012     | 10/23/2012    | 177                        | S                   |
| 624          | <i>Sin3B<sup>p/-</sup>KRas<sup>pG12D</sup></i>  | 6/2/2012      | 5/29/2013     | 361                        | A                   |
| 627          | <i>Sin3B<sup>p/-</sup>KRas<sup>pG12D</sup></i>  | 6/2/2012      | 5/29/2013     | 361                        | S                   |
| 611          | <i>Sin3B<sup>p/-</sup>KRas<sup>pG12D</sup></i>  | 5/23/2012     | 5/15/2013     | 357                        | S                   |
| 605          | <i>Sin3B<sup>p/-</sup>KRas<sup>pG12D</sup></i>  | 5/23/2012     | 2/8/2013      | 261                        | A                   |
| 568          | <i>Sin3B<sup>p/-</sup>KRas<sup>pG12D</sup></i>  | 5/11/2012     | 11/18/2012    | 191                        | D                   |
| 576          | <i>Sin3B<sup>p/-</sup>KRas<sup>pG12D</sup></i>  | 5/10/2012     | 11/29/2012    | 203                        | A                   |
| 536          | <i>Sin3B<sup>p/-</sup>KRas<sup>pG12D</sup></i>  | 4/23/2012     | 4/26/2013     | 368                        | S                   |
| 540          | <i>Sin3B<sup>p/-</sup>KRas<sup>pG12D</sup></i>  | 4/23/2012     | 4/26/2013     | 368                        | S                   |
| 509          | <i>Sin3B<sup>p/-</sup>KRas<sup>pG12D</sup></i>  | 4/11/2012     | 4/19/2013     | 373                        | S                   |
| 429          | <i>Sin3B<sup>p/-</sup>KRas<sup>pG12D</sup></i>  | 2/28/2012     | 12/26/2012    | 302                        | D                   |
| 407          | <i>Sin3B<sup>p/-</sup>KRas<sup>pG12D</sup></i>  | 2/25/2012     | 12/18/2012    | 297                        | D                   |
| 381          | <i>Sin3B<sup>p/-</sup>KRas<sup>pG12D</sup></i>  | 2/15/2012     | 2/19/2013     | 370                        | A                   |
| 47           | <i>Sin3B<sup>p/-</sup>KRas<sup>pG12D</sup></i>  | 7/7/2011      | 5/5/2012      | 303                        | D                   |
| 265          | <i>Sin3B<sup>p/-</sup>KRas<sup>pG12D</sup></i>  | 8/22/2011     | 6/20/2012     | 303                        | S                   |
| 2            | <i>Sin3B<sup>p/-</sup>KRas<sup>pG12D</sup></i>  | 6/8/2011      | 4/10/2012     | 307                        | A                   |
| 115          | <i>Sin3B<sup>p/-</sup>KRas<sup>pG12D</sup></i>  | 8/22/2011     | 7/10/2012     | 323                        | A                   |
| 242          | <i>Sin3B<sup>p/-</sup>KRas<sup>pG12D</sup></i>  | 12/23/2011    | 12/26/2012    | 369                        | S                   |
| 99           | <i>Sin3B<sup>p/-</sup>KRas<sup>pG12D</sup></i>  | 9/29/2011     | 10/9/2012     | 376                        | A                   |
| 941          | <i>Sin3B<sup>p+/-</sup>KRas<sup>pG12D</sup></i> | 9/26/2012     | 5/29/2013     | 245                        | S                   |
| 894          | <i>Sin3B<sup>p+/-</sup>KRas<sup>pG12D</sup></i> | 9/5/2012      | 5/29/2013     | 266                        | D                   |
| 942          | <i>Sin3B<sup>p+/-</sup>KRas<sup>pG12D</sup></i> | 9/26/2012     | 5/29/2013     | 245                        | S                   |
| 855          | <i>Sin3B<sup>p+/-</sup>KRas<sup>pG12D</sup></i> | 8/22/2012     | 2/12/2013     | 174                        | S                   |
| 857          | <i>Sin3B<sup>p+/-</sup>KRas<sup>pG12D</sup></i> | 8/22/2012     | 3/5/2013      | 195                        | S                   |
| 821          | <i>Sin3B<sup>p+/-</sup>KRas<sup>pG12D</sup></i> | 8/12/2012     | 5/29/2013     | 290                        | A                   |
| 822          | <i>Sin3B<sup>p+/-</sup>KRas<sup>pG12D</sup></i> | 8/12/2012     | 5/15/2013     | 276                        | A                   |
| 788          | <i>Sin3B<sup>p+/-</sup>KRas<sup>pG12D</sup></i> | 8/1/2012      | 5/29/2013     | 301                        | A                   |
| 791          | <i>Sin3B<sup>p+/-</sup>KRas<sup>pG12D</sup></i> | 8/1/2012      | 5/29/2013     | 301                        | A                   |
| 778          | <i>Sin3B<sup>p+/-</sup>KRas<sup>pG12D</sup></i> | 7/24/2012     | 5/29/2013     | 309                        | S                   |
| 664          | <i>Sin3B<sup>p+/-</sup>KRas<sup>pG12D</sup></i> | 6/1/2012      | 10/16/2012    | 137                        | S                   |
| 671          | <i>Sin3B<sup>p+/-</sup>KRas<sup>pG12D</sup></i> | 6/16/2012     | 11/22/2012    | 159                        | S                   |
| 379          | <i>Sin3B<sup>p+/-</sup>KRas<sup>pG12D</sup></i> | 2/15/2012     | 7/24/2012     | 160                        | S                   |
| 690          | <i>Sin3B<sup>p+/-</sup>KRas<sup>pG12D</sup></i> | 6/19/2012     | 5/29/2013     | 344                        | S                   |
| 426          | <i>Sin3B<sup>p+/-</sup>KRas<sup>pG12D</sup></i> | 2/27/2012     | 8/15/2012     | 170                        | A                   |

|     |                                                 |            |            |     |   |
|-----|-------------------------------------------------|------------|------------|-----|---|
| 645 | <i>Sin3B<sup>p+/-</sup>KRas<sup>pG12D</sup></i> | 6/11/2012  | 5/29/2013  | 352 | A |
| 77  | <i>Sin3B<sup>p+/-</sup>KRas<sup>pG12D</sup></i> | 12/5/2011  | 5/25/2012  | 172 | D |
| 658 | <i>Sin3B<sup>p+/-</sup>KRas<sup>pG12D</sup></i> | 6/10/2012  | 5/29/2013  | 353 | S |
| 652 | <i>Sin3B<sup>p+/-</sup>KRas<sup>pG12D</sup></i> | 6/10/2012  | 5/29/2013  | 353 | A |
| 664 | <i>Sin3B<sup>p+/-</sup>KRas<sup>pG12D</sup></i> | 6/1/2012   | 5/29/2013  | 362 | S |
| 45  | <i>Sin3B<sup>p+/-</sup>KRas<sup>pG12D</sup></i> | 7/7/2011   | 1/10/2012  | 187 | D |
| 216 | <i>Sin3B<sup>p+/-</sup>KRas<sup>pG12D</sup></i> | 12/9/2011  | 6/20/2012  | 194 | A |
| 219 | <i>Sin3B<sup>p+/-</sup>KRas<sup>pG12D</sup></i> | 12/9/2011  | 6/20/2012  | 194 | A |
| 400 | <i>Sin3B<sup>p+/-</sup>KRas<sup>pG12D</sup></i> | 2/21/2012  | 9/7/2012   | 199 | A |
| 570 | <i>Sin3B<sup>p+/-</sup>KRas<sup>pG12D</sup></i> | 5/11/2012  | 5/15/2013  | 369 | A |
| 403 | <i>Sin3B<sup>p+/-</sup>KRas<sup>pG12D</sup></i> | 2/21/2012  | 9/21/2012  | 213 | A |
| 549 | <i>Sin3B<sup>p+/-</sup>KRas<sup>pG12D</sup></i> | 4/29/2012  | 12/21/2012 | 236 | S |
| 551 | <i>Sin3B<sup>p+/-</sup>KRas<sup>pG12D</sup></i> | 4/29/2012  | 4/26/2013  | 362 | A |
| 553 | <i>Sin3B<sup>p+/-</sup>KRas<sup>pG12D</sup></i> | 4/29/2012  | 4/26/2013  | 362 | A |
| 498 | <i>Sin3B<sup>p+/-</sup>KRas<sup>pG12D</sup></i> | 4/5/2012   | 4/19/2013  | 379 | S |
| 65  | <i>Sin3B<sup>p+/-</sup>KRas<sup>pG12D</sup></i> | 8/17/2011  | 4/13/2012  | 240 | A |
| 196 | <i>Sin3B<sup>p+/-</sup>KRas<sup>pG12D</sup></i> | 11/23/2011 | 8/4/2012   | 255 | S |
| 70  | <i>Sin3B<sup>p+/-</sup>KRas<sup>pG12D</sup></i> | 8/22/2011  | 5/25/2012  | 277 | S |
| 389 | <i>Sin3B<sup>p+/-</sup>KRas<sup>pG12D</sup></i> | 2/19/2012  | 12/14/2012 | 299 | A |
| 390 | <i>Sin3B<sup>p+/-</sup>KRas<sup>pG12D</sup></i> | 2/19/2012  | 1/29/2013  | 345 | A |
| 160 | <i>Sin3B<sup>p+/-</sup>KRas<sup>pG12D</sup></i> | 11/10/2011 | 9/7/2012   | 302 | A |
| 200 | <i>Sin3B<sup>p+/-</sup>KRas<sup>pG12D</sup></i> | 11/23/2011 | 9/21/2012  | 303 | A |
| 226 | <i>Sin3B<sup>p+/-</sup>KRas<sup>pG12D</sup></i> | 12/16/2011 | 11/28/2012 | 348 | A |
| 59  | <i>Sin3B<sup>p+/-</sup>KRas<sup>pG12D</sup></i> | 8/17/2011  | 8/15/2012  | 364 | A |
| 66  | <i>Sin3B<sup>p+/-</sup>KRas<sup>pG12D</sup></i> | 8/17/2011  | 8/15/2012  | 364 | A |
| 3   | <i>Sin3B<sup>p+/-</sup>KRas<sup>pG12D</sup></i> | 6/8/2011   | 7/10/2012  | 398 | A |
| 46  | <i>Sin3B<sup>p+/-</sup>KRas<sup>pG12D</sup></i> | 6/8/2011   | 7/10/2012  | 398 | A |

<sup>A</sup> A: autopsy (see Supplementary Table 2-3); D: animal died; S: animal sacrificed

Supplementary Table 2: Description of 6 - 12 month old sacrificed animals

| mouse number | genotyping                                                  | age at death in months | mouse description at autopsy                                                                                                                                                                              | acini (%) | precursor lesions present              | number of tumors per biopsy | number of lymph nodes per biopsy <sup>A</sup>    | presence of duodenal tissue in biopsy <sup>A</sup> | presence of colonic tissue in biopsy <sup>A</sup> | description of invasive tumors                                                                             |
|--------------|-------------------------------------------------------------|------------------------|-----------------------------------------------------------------------------------------------------------------------------------------------------------------------------------------------------------|-----------|----------------------------------------|-----------------------------|--------------------------------------------------|----------------------------------------------------|---------------------------------------------------|------------------------------------------------------------------------------------------------------------|
| 216          | <i>Sin3B</i> <sup>fl/+</sup><br><i>KRas</i> <sup>G12D</sup> | 6                      | mice ill appearing with enlarged abdomen; pancreas was tough and granular                                                                                                                                 | 0         | PanINs                                 | 1                           | 4/neg                                            | no                                                 | no                                                |                                                                                                            |
| 219          | <i>Sin3B</i> <sup>fl/+</sup><br><i>KRas</i> <sup>G12D</sup> | 6                      | mouse ill appearing, pancreas tough and granular; no visible pancreatic tumors                                                                                                                            | 0         | PanINs                                 | 0                           | 0                                                | no                                                 | no                                                |                                                                                                            |
| 426          | <i>Sin3B</i> <sup>fl/+</sup><br><i>KRas</i> <sup>G12D</sup> | 6                      | mouse ill appearing, pancreas was white and granular, tumor present in middle of the pancreas                                                                                                             | 0         | PanINs                                 | 0                           | 3/neg                                            | no                                                 | no                                                |                                                                                                            |
| 422          | <i>Sin3B</i> <sup>fl/+</sup><br><i>KRas</i> <sup>G12D</sup> | 6                      | mouse healthy appearing, pancreas was tough and granular                                                                                                                                                  | 0         | PanINs                                 | 3                           | 2/neg                                            | yes/neg                                            | no                                                |                                                                                                            |
| 389          | <i>Sin3B</i> <sup>fl/+</sup><br><i>KRas</i> <sup>G12D</sup> | 10                     | mouse ill appearing, pancreas was tough and granular and fused with the small intestine                                                                                                                   | 0         | PanINs                                 | 1 (invasive)                | 2/neg                                            | no                                                 | yes/neg                                           | ADENOCARCINOMA. TUBULAR, WELL TO MODERATLY DIFFERENTIATED, SCHIROUS STROMA                                 |
| 822          | <i>Sin3B</i> <sup>fl/+</sup><br><i>KRas</i> <sup>G12D</sup> | 9                      | mouse ill appearing, pancreas was tough and granular                                                                                                                                                      | 1         | PanINs                                 | 2                           | 1/neg                                            | no                                                 | yes/neg                                           |                                                                                                            |
| 65           | <i>Sin3B</i> <sup>fl/+</sup><br><i>KRas</i> <sup>G12D</sup> | 8                      | mouse ill appearing, pancreas was tough and granular                                                                                                                                                      | 0         | PanINs                                 | 0                           | 1/neg                                            | no                                                 | no                                                |                                                                                                            |
| 160          | <i>Sin3B</i> <sup>fl/+</sup><br><i>KRas</i> <sup>G12D</sup> | 10                     | mouse ill appearing, pancreas was granular, pancreas fused with the small intestine and with the omentum, invaded the bile duct, multiple tumors present in the pancreas, metastasis visible in the liver | 0         | PanINs                                 | 1 (invasive)                | 0                                                | yes/invaded                                        | no                                                | ADENOCARCINOMA. TUBULAR AND PAPILLARY, MODERATLY TO POORLY DIFFERENTIATED, SCHIROUS STROMA                 |
| 400          | <i>Sin3B</i> <sup>fl/+</sup><br><i>KRas</i> <sup>G12D</sup> | 7                      | mouse ill appearing, pancreas tough and granular, cyst present in pancreatic tail                                                                                                                         | 1         | PanINs and large retention cyst        | 4                           | 2/neg                                            | yes/neg                                            | no                                                |                                                                                                            |
| 403          | <i>Sin3B</i> <sup>fl/+</sup><br><i>KRas</i> <sup>G12D</sup> | 7                      | mouse ill appearing, pancreas granular and started to fuse with small intestine                                                                                                                           | 0         | PanINs                                 | 2                           | 5/ neg                                           | yes/neg                                            | no                                                |                                                                                                            |
| 200          | <i>Sin3B</i> <sup>fl/+</sup><br><i>KRas</i> <sup>G12D</sup> | 11                     | mouse ill appearing, pancreas was tough and granular, pancreas fused with small intestine                                                                                                                 | 0         | PanINs                                 | 3                           | 1/neg                                            | yes/neg                                            | no                                                |                                                                                                            |
| 2            | <i>Sin3B</i> <sup>fl/+</sup> <i>KRas</i> <sup>G12D</sup>    | 10                     | mouse ill appearing, pancreas was tough and granular, visible tumor in the pancreas.                                                                                                                      | 40        | PanINs                                 | 1 (invasive) and 2 (small)  | 1/neg                                            | yes/neg                                            | no                                                | ADENOCARCINOMA. TUBULAR AND MICROPAPILLARY, WELL TO MODERATLY DIFFERENTIATED, CELLULAR AND SCHIROUS STROMA |
| 115          | <i>Sin3B</i> <sup>fl/+</sup> <i>KRas</i> <sup>G12D</sup>    | 9                      | mouse ill appearing, pancreas was tough and granular                                                                                                                                                      | 10        | PanINs                                 | 2                           | 4/ neg                                           | no                                                 | no                                                | BURKITT'S LYMPHOMA                                                                                         |
| 576          | <i>Sin3B</i> <sup>fl/+</sup> <i>KRas</i> <sup>G12D</sup>    | 7                      | mouse ill appearing, pancreas was tough and granular, intestinal occlusion present                                                                                                                        | 60        | PanINs                                 | 1 (invasive)                | 2/neg                                            | yes/neg                                            | yes/neg                                           | TUBULAR AND MICROPAPILLARY, WELL TO MODERATLY DIFFERENTIATED, CELLULAR STROMA                              |
| 605          | <i>Sin3B</i> <sup>fl/+</sup> <i>KRas</i> <sup>G12D</sup>    | 9                      | mouse was ill appearing with ascites, pancreas was tough and granular, visible cyst at the tail of the pancreas, spleen appeared enlarged                                                                 | 30        | Papillary Mucinous Neoplasm and PanINs | invasive papillary          | 2/metastatic carcinoma in one of two lymph nodes | no                                                 | no                                                | LVI TUBULAR AND MICROPAPILLARY, WELL TO MODERATLY DIFFERENTIATED, CELLULAR STROMA                          |

<sup>A</sup>neg: negative for pancreatic cancerous tissue

Supplementary Table 3: Description of 12 month old sacrificed animals

| mouse number | genotyping                                    | age at death in months | mouse description at autopsy                                                                                                                                                | acini (%) | precursor lesions present | number of tumors per biopsy | number of lymph nodes per biopsy <sup>A</sup> | presence of duodenal tissue in biopsy <sup>A</sup> | presence of colonic tissue in biopsy <sup>A</sup> | description of invasive tumors                                                                      |
|--------------|-----------------------------------------------|------------------------|-----------------------------------------------------------------------------------------------------------------------------------------------------------------------------|-----------|---------------------------|-----------------------------|-----------------------------------------------|----------------------------------------------------|---------------------------------------------------|-----------------------------------------------------------------------------------------------------|
| 46           | <i>Sin3B<sup>+/+</sup>KRAS<sup>G12D</sup></i> | 12                     | mouse healthy appearing, pancreas white, tough granular, no visible metastasis                                                                                              | 0         | PanINs                    | 0                           | 1/neg                                         | no                                                 | no                                                |                                                                                                     |
| 59           | <i>Sin3B<sup>+/+</sup>KRAS<sup>G12D</sup></i> | 12                     | mouse ill appearing with scruffy hair, large tumor at head of the pancreas, granular and white, metastasis grossly evident in liver                                         | 0         | PanINs                    | 1 (invasive)                | 3/ neg                                        | yes/invaded                                        | no                                                | TUBULAR AND MICROPAPILLARY, WELL TO MODERATLY POORLY DIFFERENTIATED, TUMOR NECROSIS CELLULAR STROMA |
| 66           | <i>Sin3B<sup>+/+</sup>KRAS<sup>G12D</sup></i> | 12                     | mouse healthy appearing, pancreas white, tough and granular, no visible metastasis                                                                                          | 0         | PanINs                    | 1                           | 0                                             | no                                                 | no                                                |                                                                                                     |
| 74           | <i>Sin3B<sup>+/+</sup>KRAS<sup>G12D</sup></i> | 12                     | mouse healthy appearing, cysts visibly present in pancreas                                                                                                                  | 30        | PanINs                    | 1                           | 6/neg                                         | no                                                 | no                                                |                                                                                                     |
| 226          | <i>Sin3B<sup>+/+</sup>KRAS<sup>G12D</sup></i> | 12                     | mouse ill appearing with scruffy hair, large tumor at the head of the pancreas, granular and white, tough, pancreas fused with small intestine, metastasis visible in liver | 5         | PanINs                    | 1 (invasive)                | 1/neg                                         | no                                                 | yes/invaded                                       | TUBULAR , WELL TO MODERATLY POORLY DIFFERENTIATED, TUMOR NECROSIS CELLULAR STROMA                   |
| 478          | <i>Sin3B<sup>+/+</sup>KRAS<sup>G12D</sup></i> | 12                     | mouse healthy appearing, pancreas tough, granular, with cysts,                                                                                                              | 25        | PanINs                    | 1 (invasive) and 3 (small)  | 5/neg                                         | yes/neg                                            | no                                                | TUBULAR, WELL TO MODERATLY DIFFERENTIATED, SCLEROTIC STROMA                                         |
| 551          | <i>Sin3B<sup>+/+</sup>KRAS<sup>G12D</sup></i> | 12                     | mouse healthy appearing, pancreas white, tough and granular, pancreas appeared large                                                                                        | 3         | PanINs                    | 3                           | 1/neg                                         | yes/neg                                            | no                                                |                                                                                                     |
| 553          | <i>Sin3B<sup>+/+</sup>KRAS<sup>G12D</sup></i> | 12                     | mouse healthy appearing, head of the pancreas appears tough, granular and white                                                                                             | 10        | PanINs                    | 0                           | 1/neg                                         | no                                                 | no                                                |                                                                                                     |
| 570          | <i>Sin3B<sup>+/+</sup>KRAS<sup>G12D</sup></i> | 12                     | mouse healthy appearing, pancreas tough, white, and granular                                                                                                                | 5         | PanINs                    | 3                           | 2/neg                                         | yes/neg                                            | yes/neg                                           |                                                                                                     |
| 645          | <i>Sin3B<sup>+/+</sup>KRAS<sup>G12D</sup></i> | 12                     | mouse healthy appearing                                                                                                                                                     | 5         | PanINs                    | 0                           | 0                                             | no                                                 | no                                                |                                                                                                     |
| 652          | <i>Sin3B<sup>+/+</sup>KRAS<sup>G12D</sup></i> | 12                     | mouse healthy appearing, pancreas appeared tough and granular, pancreas started to fuse with intestine                                                                      | 60        | PanINs                    | 1                           | 0                                             | no                                                 | no                                                |                                                                                                     |
| 788          | <i>Sin3B<sup>+/+</sup>KRAS<sup>G12D</sup></i> | 12                     | mouse healthy appearing, cyst visible at the tail of the pancreas                                                                                                           | 2         | PanINs                    | 1                           | 2/neg                                         | no                                                 | no                                                |                                                                                                     |
| 791          | <i>Sin3B<sup>+/+</sup>KRAS<sup>G12D</sup></i> | 12                     | mouse healthy appearing, pancreas granular                                                                                                                                  | 40        | PanINs                    | 4                           | 1/neg                                         | yes/neg                                            | no                                                |                                                                                                     |
| 821          | <i>Sin3B<sup>+/+</sup>KRAS<sup>G12D</sup></i> | 12                     | mouse healthy appearing, pancreas granular and tough                                                                                                                        | 30        | PanINs                    | 5                           | 1/neg                                         | yes/neg                                            | yes/neg                                           |                                                                                                     |
| 390          | <i>Sin3B<sup>+/+</sup>KRAS<sup>G12D</sup></i> | 12                     | mouse healthy appearing, pancreas tough and granular, pancreas started to fuse with the intestine                                                                           | 1         | PanINs                    | 3                           | 1/neg                                         | no                                                 | yes/neg                                           |                                                                                                     |
| 99           | <i>Sin3B<sup>+/+</sup>KRAS<sup>G12D</sup></i> | 12                     | mouse ill appearing, ascites present in abdomen, pancreas tough and granular, pancreas fused with small intestine, metastasis visible in liver                              | 2         | PanINs                    | 1 (invasive)                | 4/neg                                         | no                                                 | no                                                | TUBULAR AND MICROPAPILLARY, WELL TO MODERATLY DIFFERENTIATED, CELLULAR AND SCLEROTIC STROMA         |
| 624          | <i>Sin3B<sup>+/+</sup>KRAS<sup>G12D</sup></i> | 12                     | mouse healthy appearing, pancreas appeared enlarged and was tough and granular, pancreas fused with small intestine, no visible metastasis                                  | 10        | PanINs                    | 1 (invasive) and 2 (small)  | 1/neg                                         | no                                                 | no                                                | TUBULAR AND MICROPAPILLARY, WELL TO MODERATLY DIFFERENTIATED, CELLULAR STROMA                       |

|     |                                               |    |                                                                                                                                    |    |                                        |                            |       |             |         |                                                                               |
|-----|-----------------------------------------------|----|------------------------------------------------------------------------------------------------------------------------------------|----|----------------------------------------|----------------------------|-------|-------------|---------|-------------------------------------------------------------------------------|
| 805 | <i>Sin3B<sup>+/+</sup>KRAS<sup>G12D</sup></i> | 12 | mouse healthy appearing, pancreas appeared enlarged and was tough and granular                                                     | 10 | Papillary Mucinous Neoplasm and PanINs | 1 (invasive) and 1 (small) | 5/neg | yes/invaded | no      | TUBULAR AND MICROPAPILLARY, WELL TO MODERATLY DIFFERENTIATED, CELLULAR STROMA |
| 381 | <i>Sin3B<sup>+/+</sup>KRAS<sup>G12D</sup></i> | 12 | mouse healthy appearing, head of the pancreas appears tough and granular, tail of the pancreas appeared normal                     | 50 | PanINs                                 | 1                          | 2/neg | yes/neg     | yes/neg |                                                                               |
| 796 | <i>Sin3B<sup>+/+</sup>KRAS<sup>G12D</sup></i> | 12 | mouse healthy appearing, pancreas pink and granular, small tumor visible on head of the pancreas                                   | 70 | PanINs                                 | 1 (invasive)               | 1/neg | no          | yes/neg | spleen/neg TUBULAR , WELL TO MODERATLY DIFFERENTIATED, CELLULAR STROMA        |
| 741 | <i>Sin3B<sup>+/+</sup>KRAS<sup>G12D</sup></i> | 12 | mouse healthy appearing, large tumor visible on head of the pancreas, pancreas fused with small intestine, visible lung metastasis | 5  | PanINs                                 | 1 (invasive)               | 1/neg | no          | yes/neg | TUBULAR AND MICROPAPILLARY, WELL TO MODERATLY DIFFERENTIATED, CELLULAR STROMA |

<sup>A</sup>neg: negative for pancreatic cancerous tissue
